# Supplementary material
Source: MDPI journal article supplement (https://www.mdpi.com/2072-4292/9/6/542)
Supplement: s1 [file s1]

# Supplementary Materials: Optimizing the semi-analytical algorithms for estimating *Chlorophyll-a* and *Phycocyanin* concentrations in inland waters in Korea

JongCheol Pyo <sup>1</sup>, Yakov Pachepsky <sup>2</sup>, Sang-Soo Baek <sup>1</sup>, YongSeong Kwon <sup>1</sup>, MinJeong Kim <sup>1</sup>, Hyuk Lee <sup>3</sup>, Sanghyun Park <sup>3</sup>, YoonKyung Cha <sup>4</sup>, Rim Ha <sup>3</sup>, Gibeom Nam <sup>3</sup>, Yongeun Park <sup>1,\*</sup> and Kyung Hwa Cho <sup>1,\*</sup>

<sup>1</sup> School of Urban and Environmental Engineering, Ulsan National Institute of Science and Technology, Ulsan, 689-798, Republic of Korea; jcp01@unist.ac.kr, kbcqr@naver.com, wizkys@naver.com, paekhap0835@naver.com, phdyongseun@gmail.com, khcho@unist.ac.kr

<sup>2</sup> Environmental Microbial and Food Safety Laboratory, USDA-ARS, Beltsville, MD 20705, USA; Yakov.Pachepsky@ARS.USDA.GOV,

<sup>3</sup> Water Quality Assessment Research Division, National Institute of Environmental Research, Environmental Research Complex, Incheon, 22689, Republic of Korea; ehyuk@korea.kr, pbaby75@korea.kr, rim486@korea.kr, gbnam@korea.kr

<sup>4</sup> School of Environmental Engineering, University of Seoul, Dongdaemun-gu, Seoul, 130-743, Republic of Korea; ykcha@uos.ac.kr

\* Correspondence: Yongeun Park; Kyung Hwa Cho; phdyongseun@gmail.com; khcho@unist.ac.kr; Tel.: +80-052-217-2829

### A1. Semi-analytical algorithms

The backscattering function and  $Y$  value in the IIMIW model were parametrized as

$$b_p(P_1) = \frac{b_b(778) - b_w(778)}{\left(\frac{P_1}{778}\right)^Y} \quad (S1)$$

$$Y = P_2 \left( P_3 + P_4 \exp \left( P_5 \frac{r_{rs}(P_6)}{r_{rs}(P_1)} \right) \right) \quad (S2)$$

where the  $P_x$  is an interested parameter.

The additional parameters were selected in terms of the absorption coefficient of PC like below

$$a_{cdom}(P_7) = a_g(P_7) - a_{phy-pc}(P_7) \quad (S3)$$

$$a_{cdom}(P_8) = a_g(P_8) - a_{phy-pc}(P_8) \quad (S4)$$

$$S_{cdom} = \frac{1}{P_9} \ln \left( \frac{a_{cdom}(P_7)}{a_{cdom}(P_8)} \right) \quad (S5)$$

$$a_{phy-pc}(P_7, P_8, P_{23}) = P_{10} a_g(675) + P_{11} \quad (S6)$$

The backscattering that was independent on the wavelength was set to parameter as

$$b_b(778) = \frac{P_{12} R_{rs}(778)}{0.082 + P_{13} R_{rs}(778)} \quad (S7)$$

Then, the bio-optical algorithms were parameterized as follows.

For the Gons algorithm,

$$Chl - a(mg \ m^{-3}) = \frac{a_g(P_{14})}{P_{15}} \quad (S8)$$

For the Gilerson algorithm,

$$Chl - a(mg \ m^{-3}) = \left( \frac{a_g(P_{14})}{P_{16}} \right)^{P_{17}} \quad (S9)$$

For the Ritchie algorithm,

$$Chl - a(mg \ m^{-3}) = P_{22} (P_{18} a_{gh}(630) + P_{19} a_{gh}(647) + P_{20} a_{gh}(P_{14}) + P_{21} a_{gh}(630)) \quad (S10)$$

For the PC algorithm,

$$PC(mg \ m^{-3}) = \frac{a_{pc}(P_{23})}{P_{24}} \quad (S11)$$

For the Duan algorithm,

$$a_g(\lambda_1) = \frac{R_{rs}(709)}{R_{rs}(P_{14})} (a_w(709) + b_b) - b_b^{P_{25}} - a_w(P_{14}) \quad (S12)$$

$$Chl - a(mg \ m^{-3}) = \frac{a_g(P_{14})}{P_{26}} \quad (S13)$$

For the Simis algorithm,

$$a_g(\lambda_1) = \frac{1}{P_{27}} \left( \frac{R_{rs}(709)}{R_{rs}(P_{14})} (a_w(709) + b_b) - b_b - a_w(P_{14}) \right) \quad (S14)$$

$$Chl - a(mg \ m^{-3}) = \frac{a_g(P_{14})}{P_{28}} \quad (S15)$$

For the Simis algorithm for PC

$$a_g(P_{23}) = \frac{1}{P_{29}} \left( \frac{R_{rs}(709)}{R_{rs}(P_{23})} (a_w(709) - b_b) - b_b - a_w(P_{23}) \right) - \left( \frac{P_{30}}{P_{27}} \left( \frac{R_{rs}(709)}{R_{rs}(P_{14})} (a_w(709) - b_b) - b_b - a_w(P_{14}) \right) \right) \quad (S16)$$

$$PC(mg\ m^{-3}) = \frac{a_g(P_{23})}{P_{31}} \quad (S17)$$

Table S1. Summary of the *Chl-a* algorithms

Chl-a Algorithms

|                              | Gons*                                                                                                                                                                                                                                                                                                                                                                                                                                                                  | Gilerson**                                                               | Ritchie***                                                                                    | Simis****                                                                                                                                  | Duan*****                                                                                                              |
|------------------------------|------------------------------------------------------------------------------------------------------------------------------------------------------------------------------------------------------------------------------------------------------------------------------------------------------------------------------------------------------------------------------------------------------------------------------------------------------------------------|--------------------------------------------------------------------------|-----------------------------------------------------------------------------------------------|--------------------------------------------------------------------------------------------------------------------------------------------|------------------------------------------------------------------------------------------------------------------------|
| Semi-analytical<br>algorithm | $b_b(\lambda) = b_p(560) \left(\frac{560}{\lambda}\right)^Y + b_w(\lambda)$ $b_p(560) = \frac{b_b(778) - b_w(778)}{\left(\frac{560}{778}\right)^Y}$ $b_b(778) = \frac{r_{rs}(778)a_w(778)}{0.082 - r_{rs}(778)}$ $Y = 2.0 \left(1 - 1.2 \exp\left(-0.9 \frac{r_{rs}(443)}{r_{rs}(560)}\right)\right)$ $a_g(\lambda_1) = \left[\frac{R(\lambda_2)b_b(\lambda_1)}{R(\lambda_1)b_b(\lambda_2)}(a_w(\lambda_2) + b_b(\lambda_2)) - b_b(\lambda_1) - a_w(\lambda_1)\right]$ |                                                                          |                                                                                               | $b_b(778) = \frac{1.61R_{rs}(778)}{0.082 - 0.6R_{rs}(778)}$                                                                                |                                                                                                                        |
|                              |                                                                                                                                                                                                                                                                                                                                                                                                                                                                        |                                                                          |                                                                                               | $a_g(\lambda_{chla}) = \frac{1}{0.68} \left(\frac{R_{rs}(709)}{R_{rs}(\lambda_{chla})}(a_w(709) - b_b) - b_b - a_w(\lambda_{chla})\right)$ | $a_g(\lambda_{chla}) = \frac{R_{rs}(709)}{R_{rs}(\lambda_{chla})}(a_w(709) + b_b) - b_b^{1.062} - a_w(\lambda_{chla})$ |
|                              | $\frac{a_g(\lambda_{chla})}{a_g^*(\lambda_{chla})}$                                                                                                                                                                                                                                                                                                                                                                                                                    | $\left(\frac{a_g(\lambda_{chla})}{a_g^*(\lambda_{chla})}\right)^{1.124}$ | $4.34(-0.3319a_{gh}(630) - 1.7485a_{gh}(647) + 11.9442a_{gh}(\lambda_1) - 1.4306a_{gh}(630))$ | $\frac{a_g(\lambda_{chla})}{a_g^*(\lambda_{chla})}$                                                                                        | $\frac{a_g(\lambda_{chla})}{a_g^*(\lambda_{chla})}$                                                                    |

Unit of the bio-optical model result is mg m<sup>-3</sup>. \* is referenced by Gons et al., (2002),\*\* is referenced by Gilerson et al., (2010), \*\*\* is referenced by Ritchie (2008), \*\*\*\* is referenced by Simis et al., (2005), and \*\*\*\*\* is referenced by Duan et al., (2012).

**Table S2.** Summary of the PC algorithms

| PC Algorithms                |                                                                                                                                                                                                                                                                                                                                                                                                                                                                                                                                                                                                 |                                                                                                                                                                                                                                                                                     |
|------------------------------|-------------------------------------------------------------------------------------------------------------------------------------------------------------------------------------------------------------------------------------------------------------------------------------------------------------------------------------------------------------------------------------------------------------------------------------------------------------------------------------------------------------------------------------------------------------------------------------------------|-------------------------------------------------------------------------------------------------------------------------------------------------------------------------------------------------------------------------------------------------------------------------------------|
|                              | Li*                                                                                                                                                                                                                                                                                                                                                                                                                                                                                                                                                                                             | Simis**                                                                                                                                                                                                                                                                             |
| Semi-analytical<br>algorithm | $a_g(\lambda_1) = \left[ \frac{R(\lambda_2)b_b(\lambda_1)}{R(\lambda_1)b_b(\lambda_2)} (a_w(\lambda_2) + b_b(\lambda_2)) \right] - b_b(\lambda_1) - a_w(\lambda_1)$ $a_{phy}(\lambda) = a_g(\lambda) - a_{cdom}(\lambda)$ $a_{cdom}(412) = a_g(412) - a_{phy-pc}(412)$ $a_{cdom}(510) = a_g(510) - a_{phy-pc}(510)$ $S_{cdom} = \frac{1}{98} \ln \left( \frac{a_{cdom}(412)}{a_{cdom}(510)} \right)$ $a_{cdom}(\lambda) = a_{cdom}(412) \exp(-S_{cdom}(\lambda - 412))$ $a_{phy-pc}(\lambda) = C_1(\lambda) a_g(675) + C_2(\lambda)$ $a_{pc}(\lambda) = a_{phy}(\lambda) - a_{phy-pc}(\lambda)$ | $a_g(\lambda_{pc}) = \frac{1}{0.84} \left( \frac{R_{rs}(709)}{R_{rs}(\lambda_{pc})} (a_w(709) - b_b) - b_b - a_w(\lambda_{pc}) \right) -$ $\left( \frac{0.24}{0.68} \left( \frac{R_{rs}(709)}{R_{rs}(\lambda_{chla})} (a_w(709) - b_b) - b_b - a_w(\lambda_{chla}) \right) \right)$ |
|                              | $\frac{a_{pc}(\lambda_{pc})}{a_{pc}^*(\lambda_{pc})}$                                                                                                                                                                                                                                                                                                                                                                                                                                                                                                                                           | $\frac{a_g(\lambda_{pc})}{a_g^*(\lambda_{pc})}$                                                                                                                                                                                                                                     |

Unit of the bio-optical model result is mg m<sup>-3</sup>. \* is referenced by Li et al., (2015),\*\* is referenced by Simis et al., (2007).

**Table S3.** Sensitivity parameter ranking for the semi-analytical algorithms

| Parameter        | Gons     | Gilerson  | Ritchie  | Simis    | Duan     | Li         | Simis(PC) |
|------------------|----------|-----------|----------|----------|----------|------------|-----------|
| $P_1$            | 6 (4.6)  | 7 (39.6)  | 9 (3.5)  | -        | -        | 9 (85.0)   | -         |
| $P_2$            | 3 (39.3) | 4 (333.3) | 4 (22.0) | -        | -        | 2 (849.2)  | -         |
| $P_3$            | 2 (52.0) | 2 (457.7) | 1 (32.5) | -        | -        | 1 (1185.4) | -         |
| $P_4$            | 4 (26.7) | 5 (258.2) | 5 (19.2) | -        | -        | 4 (626.8)  | -         |
| $P_5$            | 5 (7.6)  | 6 (69.0)  | 6 (6.0)  | -        | -        | 5 (167.8)  | -         |
| $P_6$            | 8 (1.2)  | 9 (14.0)  | 12 (0.9) | -        | -        | 11 (31.2)  | -         |
| $P_7$            | -        | -         | -        | -        | -        | 7 (94.7)   | -         |
| $P_8$            | -        | -         | -        | -        | -        | 6 (143.8)  | -         |
| $P_9$            | -        | -         | -        | -        | -        | 8 (85.7)   | -         |
| $P_{10(P_7)}$    | -        | -         | -        | -        | -        | 14 (10.8)  | -         |
| $P_{10(P_8)}$    | -        | -         | -        | -        | -        | 13 (14.9)  | -         |
| $P_{10(P_{23})}$ | -        | -         | -        | -        | -        | 12 (19.8)  | -         |
| $P_{11(P_7)}$    | -        | -         | -        | -        | -        | 17 (2.2)   | -         |
| $P_{11(P_8)}$    | -        | -         | -        | -        | -        | 15 (3.4)   | -         |
| $P_{11(P_{23})}$ | -        | -         | -        | -        | -        | 16 (3.0)   | -         |
| $P_{12}$         | -        | -         | -        | 4 (1.5)  | 4 (0.9)  | -          | 7 (6.9)   |
| $P_{13}$         | -        | -         | -        | 5 (0.4)  | 5 (0.3)  | -          | 8 (1.7)   |
| $P_{14}$         | 7 (3.7)  | 8 (26.2)  | 8 (4.2)  | 3 (6.7)  | 3 (2.2)  | -          | 5 (35.7)  |
| $P_{15}$         | 1 (60.6) | -         | -        | -        | -        | -          | -         |
| $P_{16}$         | -        | 1 (613.9) | -        | -        | -        | -          | -         |
| $P_{17}$         | -        | 3 (393.9) | -        | -        | -        | -          | -         |
| $P_{18}$         | -        | -         | 11 (2.1) | -        | -        | -          | -         |
| $P_{19}$         | -        | -         | 7 (5.4)  | -        | -        | -          | -         |
| $P_{20}$         | -        | -         | 3 (25.5) | -        | -        | -          | -         |
| $P_{21}$         | -        | -         | 10 (2.2) | -        | -        | -          | -         |
| $P_{22}$         | -        | -         | 2 (28.0) | -        | -        | -          | -         |
| $P_{23}$         | -        | -         | -        | -        | -        | 10 (41.8)  | 6 (8.2)   |
| $P_{24}$         | -        | -         | -        | -        | -        | 3 (824.7)  | -         |
| $P_{25}$         | -        | -         | -        | -        | 2 (13.5) | -          | -         |
| $P_{26}$         | -        | -         | -        | -        | 1 (17.5) | -          | -         |
| $P_{27}$         | -        | -         | -        | 2 (63.4) | -        | -          | 3 (378.1) |
| $P_{28}$         | -        | -         | -        | 1 (68.9) | -        | -          | -         |
| $P_{29}$         | -        | -         | -        | -        | -        | -          | 1 (494.5) |
| $P_{30}$         | -        | -         | -        | -        | -        | -          | 4 (273.5) |
| $P_{31}$         | -        | -         | -        | -        | -        | -          | 2 (449.7) |

(-) indicates the mean of the elementary effect value

Table S4. Performance analysis

| Algorithms | Referenced results      |                   |                            |                    | Single-objective optimization results |                  |                          |                   | Multi-objective optimization results |                  |                          |                    |
|------------|-------------------------|-------------------|----------------------------|--------------------|---------------------------------------|------------------|--------------------------|-------------------|--------------------------------------|------------------|--------------------------|--------------------|
|            | R <sup>2</sup>          | RMSE              | R <sup>2</sup>             | RMSE               | R <sup>2</sup>                        | RMSE             | R <sup>2</sup>           | RMSE              | R <sup>2</sup>                       | RMSE             | R <sup>2</sup>           | RMSE               |
|            |                         | (NRMSE)           |                            | (NRMSE)            |                                       | (NRMSE)          |                          | (NRMSE)           |                                      | (NRMSE)          |                          | (NRMSE)            |
|            | Absorption coefficient* |                   | Concentration estimation** |                    | Absorption coefficient                |                  | Concentration estimation |                   | Absorption coefficient               |                  | Concentration estimation |                    |
| Gons       | 0.732                   | 4.010<br>(1.217)  | 0.712                      | 16.653<br>(0.428)  | 0.746                                 | 3.362<br>(1.232) | 0.742                    | 14.019<br>(0.360) | 0.815                                | 1.470<br>(0.539) | 0.775                    | 13.027<br>(0.335)  |
| Gilerson   | 0.732                   | 4.011<br>(1.218)  | 0.722                      | 20.175<br>(0.518)  | 0.746                                 | 3.425<br>(1.255) | 0.751                    | 13.525<br>(0.347) | 0.815                                | 1.458<br>(0.534) | 0.772                    | 13.111<br>(0.337)  |
| Ritchie    | 0.732                   | 4.011<br>(1.218)  | 0.680                      | 17.272<br>(0.444)  | 0.813                                 | 2.068<br>(0.758) | 0.774                    | 12.848<br>(0.330) | 0.812                                | 1.468<br>(0.538) | 0.768                    | 13.158<br>(0.338)  |
| Simis      | 0.410                   | 4.016<br>(1.219)  | 0.429                      | 26.567<br>(0.682)  | 0.513                                 | 2.991<br>(1.096) | 0.531                    | 20.289<br>(0.521) | 0.513                                | 2.437<br>(0.893) | 0.531                    | 20.292<br>(0.521)  |
| Duan       | 0.421                   | 4.218<br>(1.281)  | 0.442                      | 21.535<br>(0.553)  | 0.530                                 | 4.133<br>(1.255) | 0.570                    | 20.163<br>(0.518) | 0.535                                | 3.507<br>(1.285) | 0.578                    | 20.098<br>(0.517)  |
| Li         | 0.002                   | 10.805<br>(4.596) | 0.001                      | 1463.1<br>(50.186) | 0.806                                 | 3.756<br>(1.592) | 0.817                    | 38.996<br>(1.338) | 0.833                                | 2.136<br>(0.941) | 0.819                    | 167.625<br>(5.750) |
| Simis (PC) | 0.583                   | 3.864<br>(1.644)  | 0.583                      | 78.238<br>(2.684)  | 0.686                                 | 3.422<br>(1.456) | 0.574                    | 59.805<br>(2.051) | 0.685                                | 2.695<br>(1.187) | 0.615                    | 56.628<br>(1.942)  |

\*The unit of RMSE for the absorption coefficient is m<sup>-1</sup> and \*\*the unit of RMSE for the concentration is mg m<sup>-3</sup>. NRMSE is normalized root mean square error.

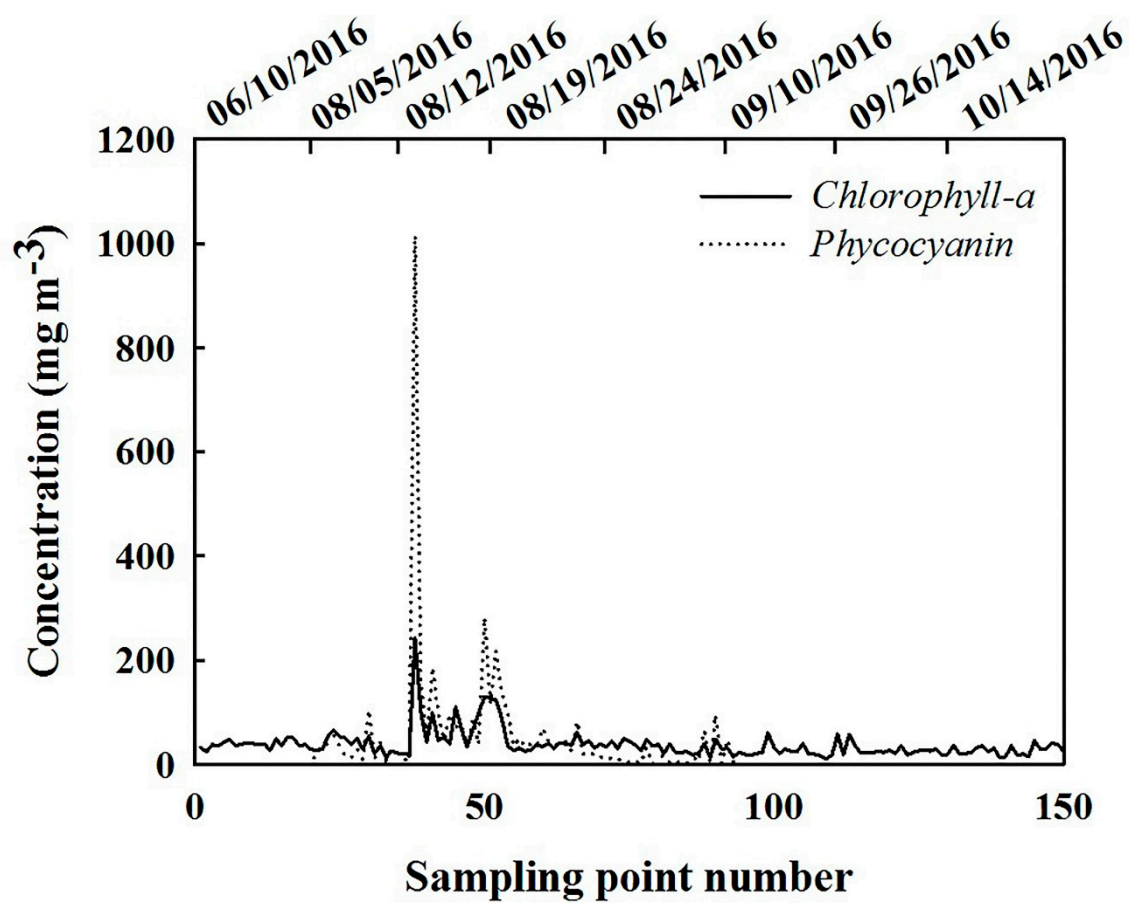

**Figure S1.** Temporal variation of the biomass concentrations, point number indicates the number of monitoring points.



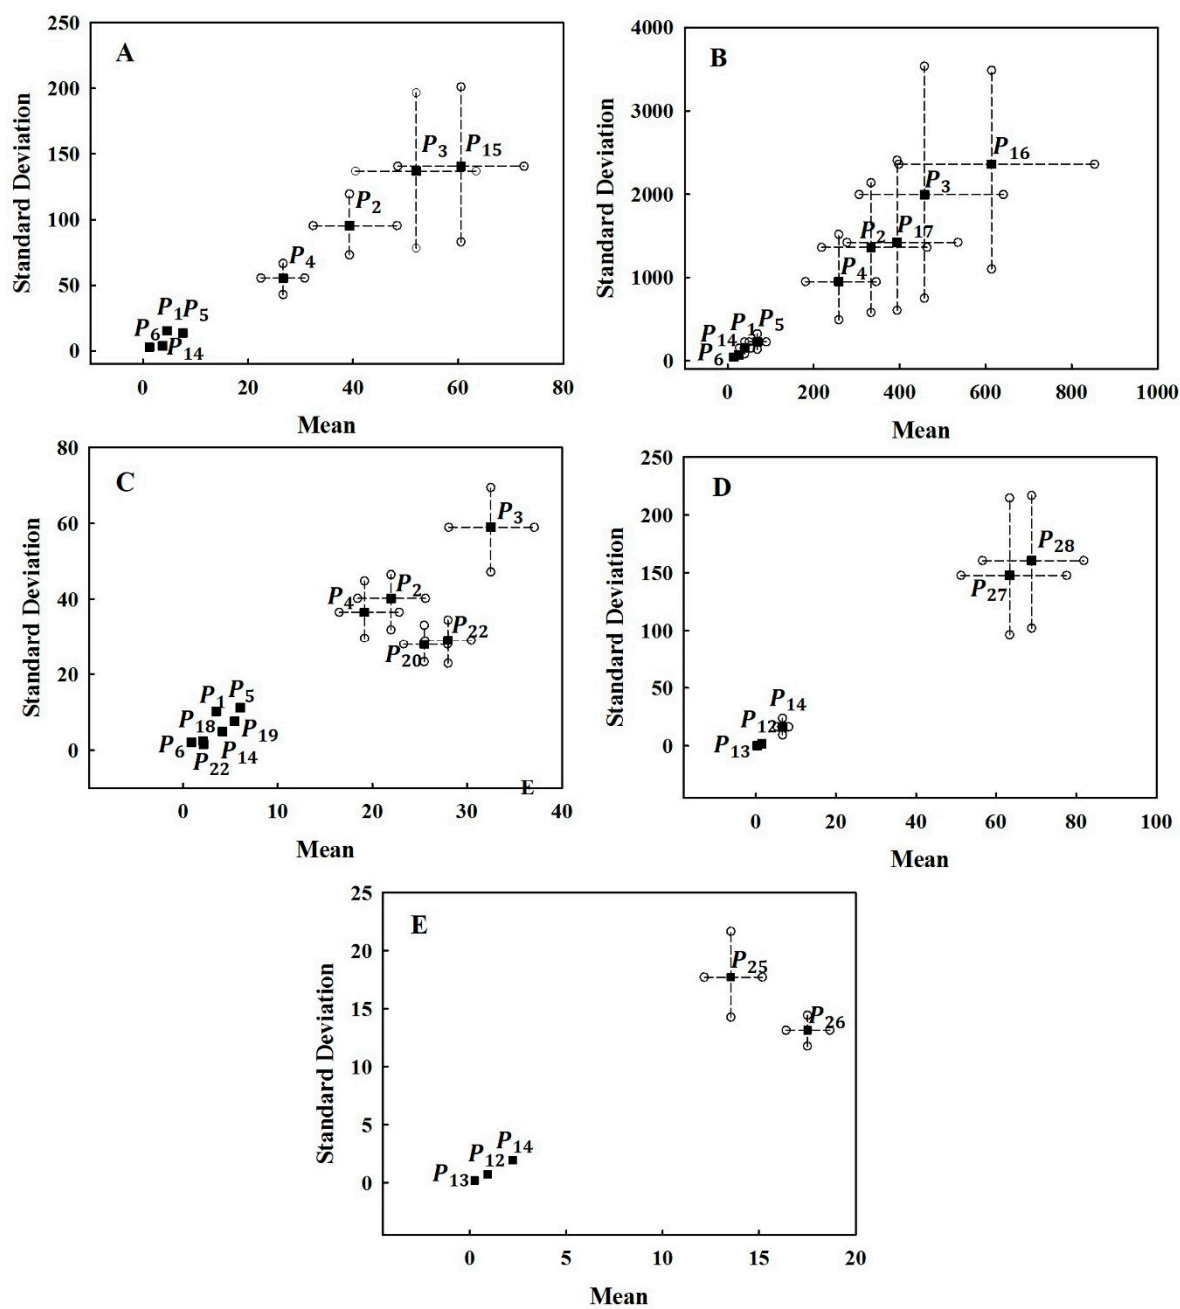

**Figure S2.** Sensitivity analysis results of *Chl-a* algorithms, A: Gons algorithm, B: Gilerson algorithm, C: Ritchie algorithm, D: Simis algorithm, and E: Duan algorithm

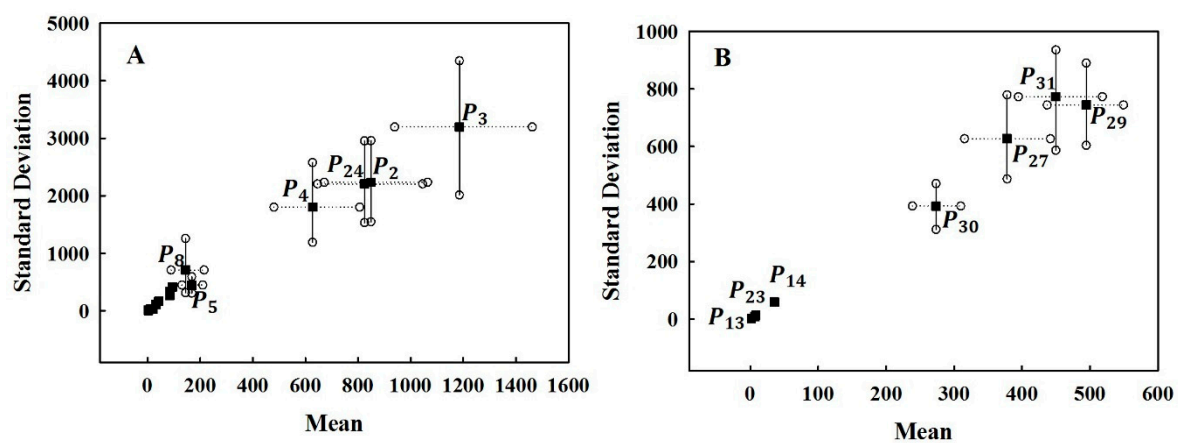

**Figure S3.** Sensitivity analysis of PC algorithms, A: Li algorithm and B: Simis algorithm

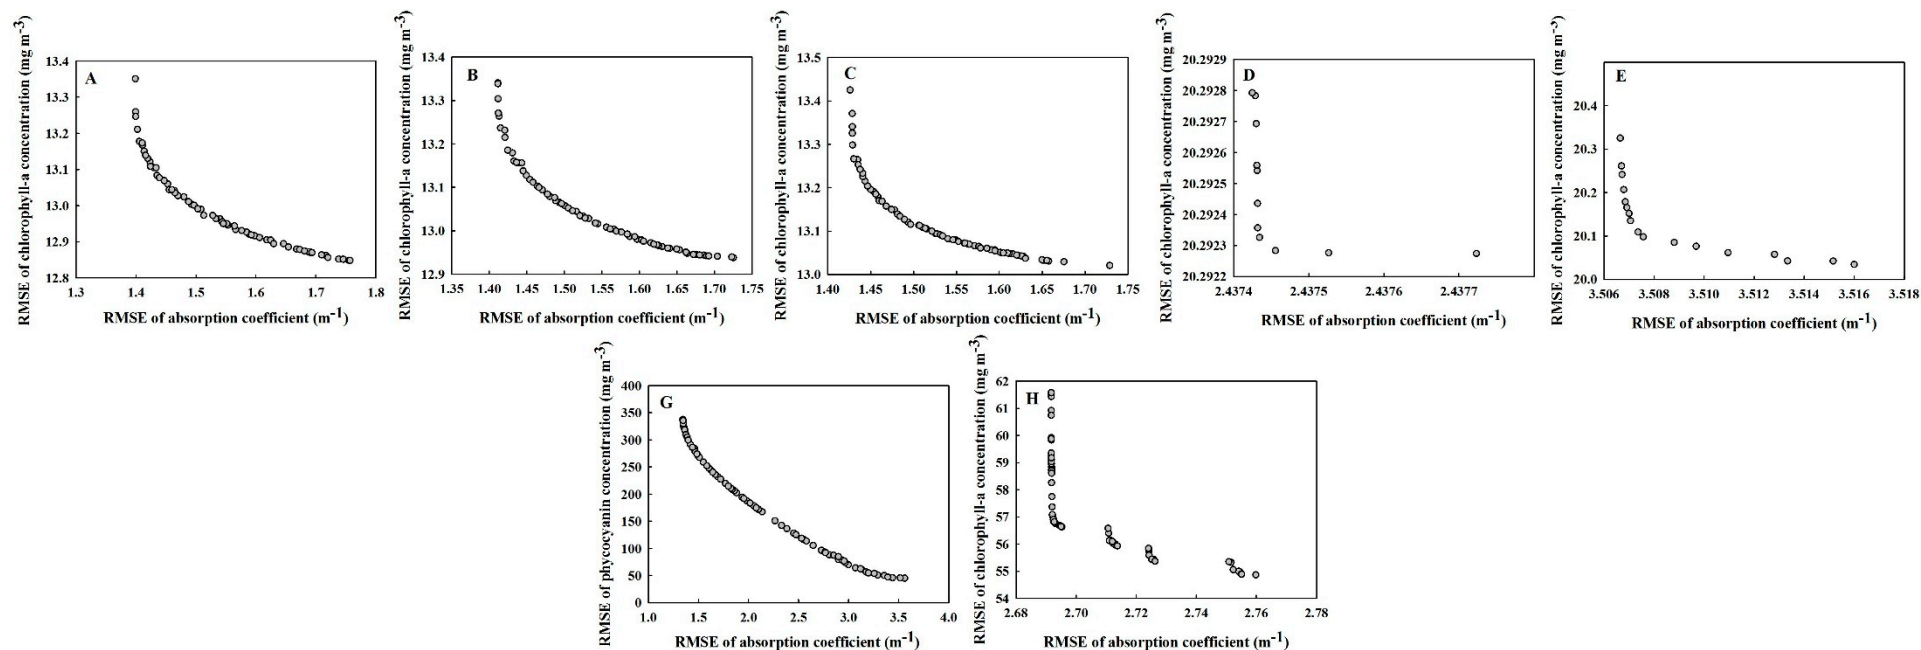

**Figure S4.** Pareto graph of multi-objective optimization, the top five panels are Pareto graph for Chl-a algorithm and the bottom panels are Pareto graph for PC algorithm, A is Gons algorithm, B is Gilerson algorithm, C is Ritchie algorithm, D is Simis algorithm, and E is Duan algorithm, G is Li algorithm and H is Simis algorithm

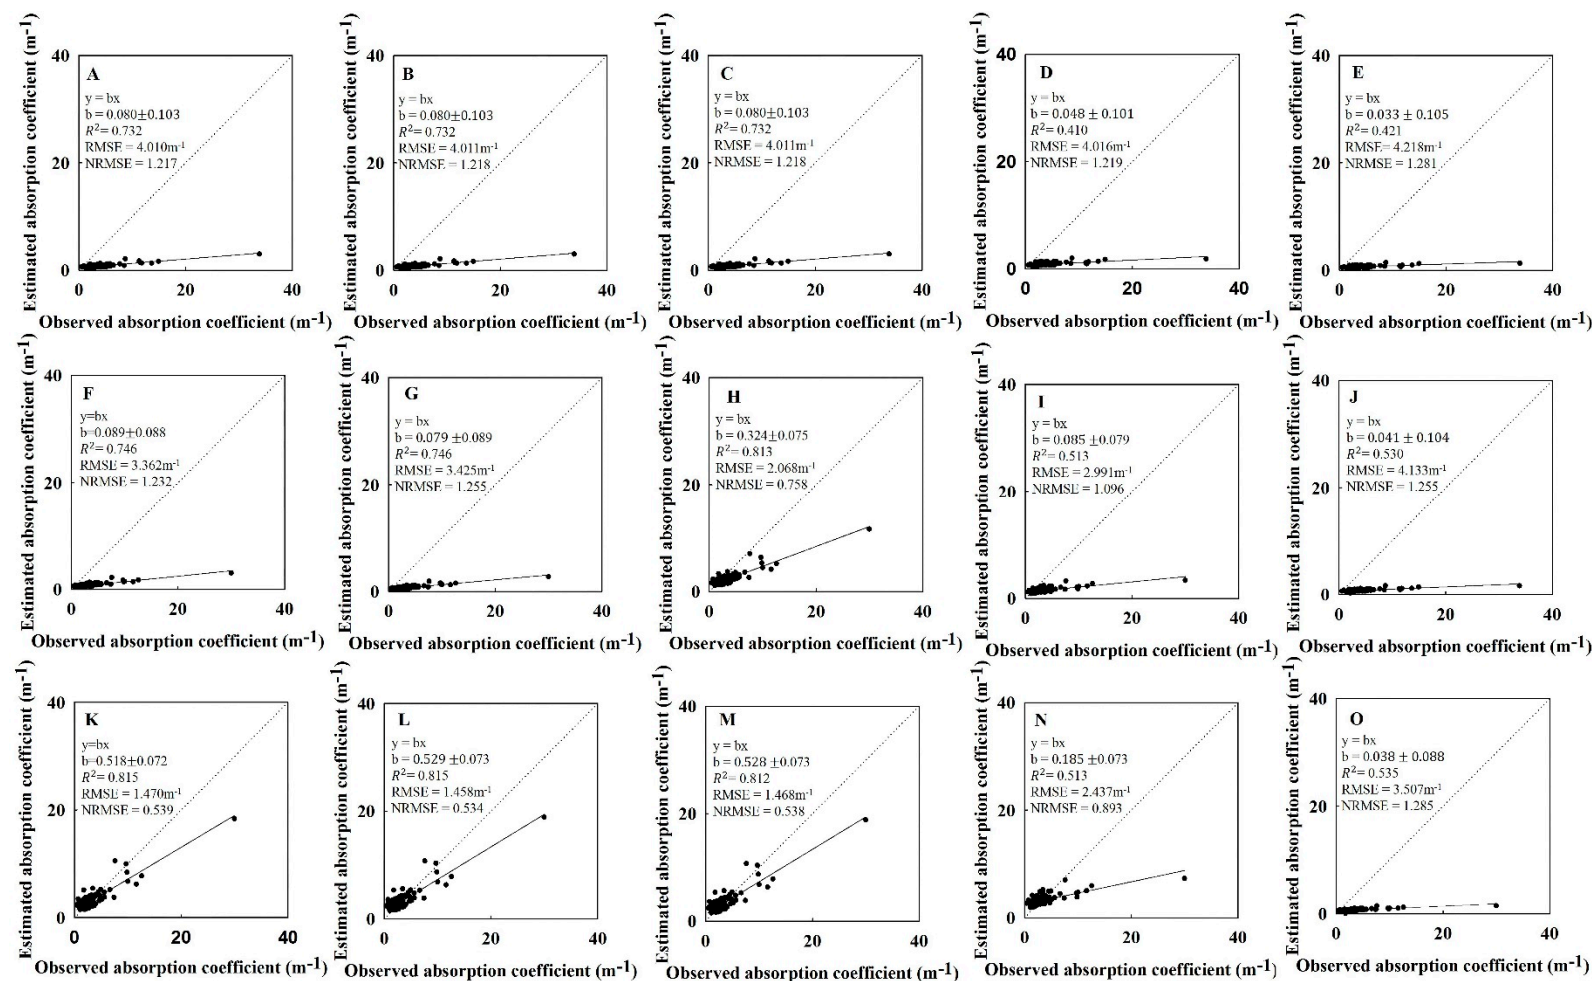

**Figure S5.** Comparison of measured, published and estimated from the single-objective and multi-objective optimization absorption coefficients in *Chl-a* algorithms. The top five panels are developed with published values, the middle five panels are developed with the single-objective optimization, and the bottom five panels are developed with the multi-objective optimization. A, F and K are Gons algorithm results, B, G, and L are Gons algorithm results, C, H, and M are Ritchie algorithm results, D, I, and N are Simis algorithm results, and E, J, and O are Duan algorithm results

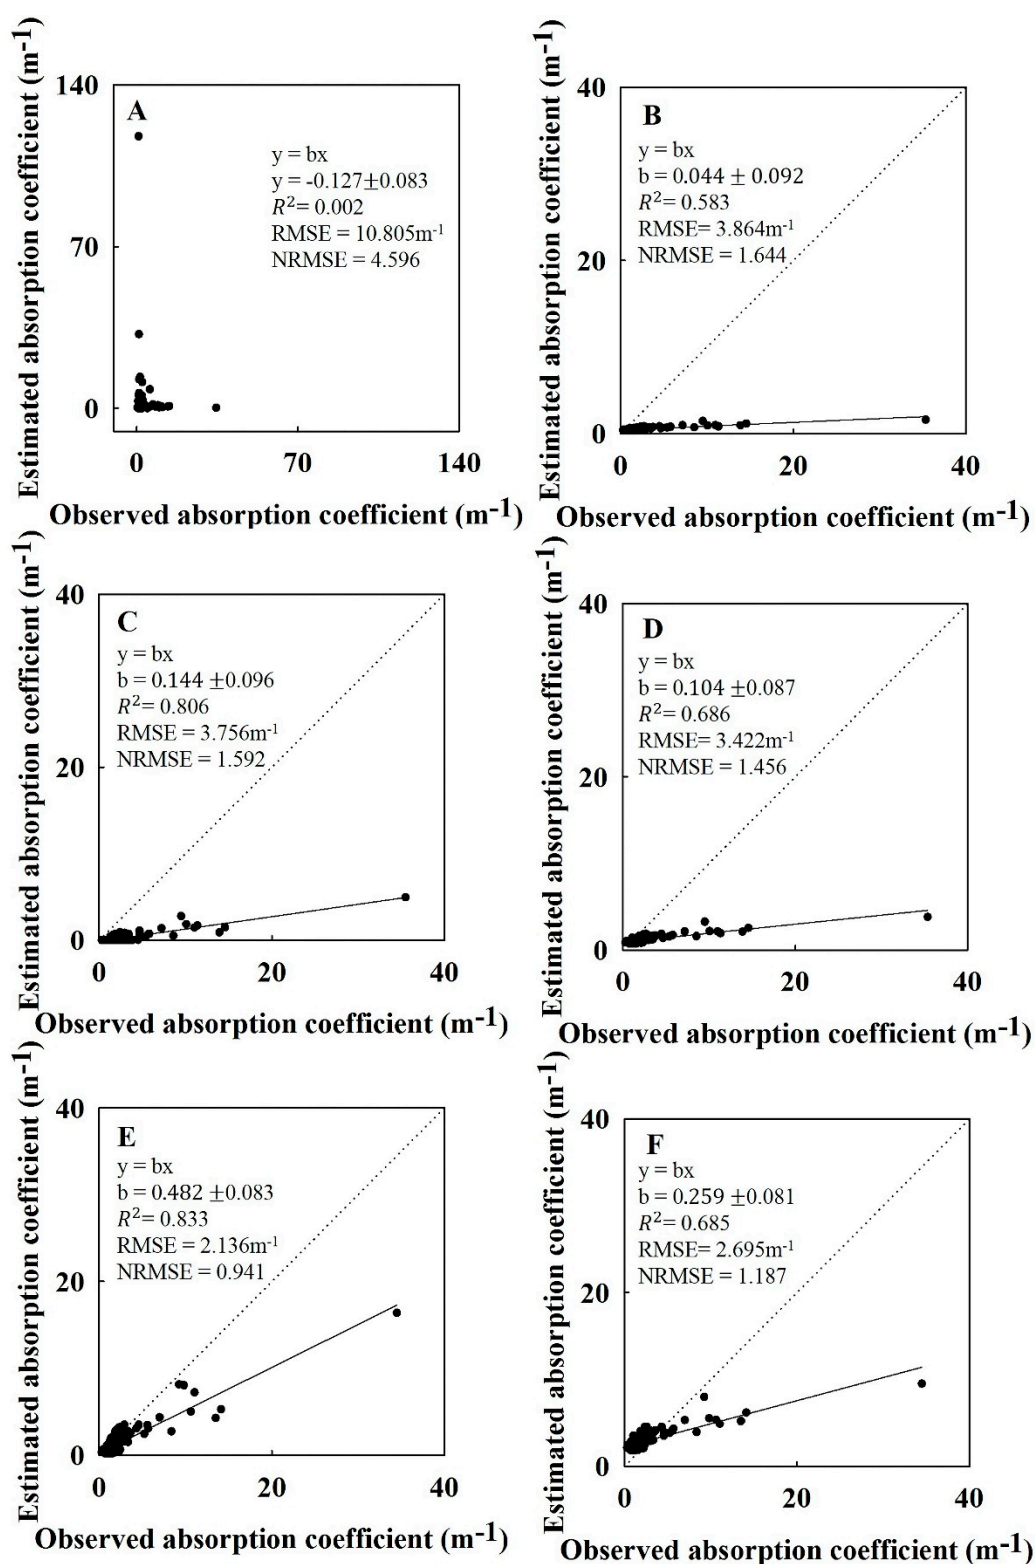

**Figure S6.** Comparison of measured, published and estimated from the single-objective and multi-objective optimization absorption coefficients in *PC* algorithms. The top two panels are developed with published values, the middle two panels are developed with single-objective optimization the bottom two panels are developed with the multi-objective optimization. A, C, and E are Li algorithm results, and B, D, and F are Simis algorithm results

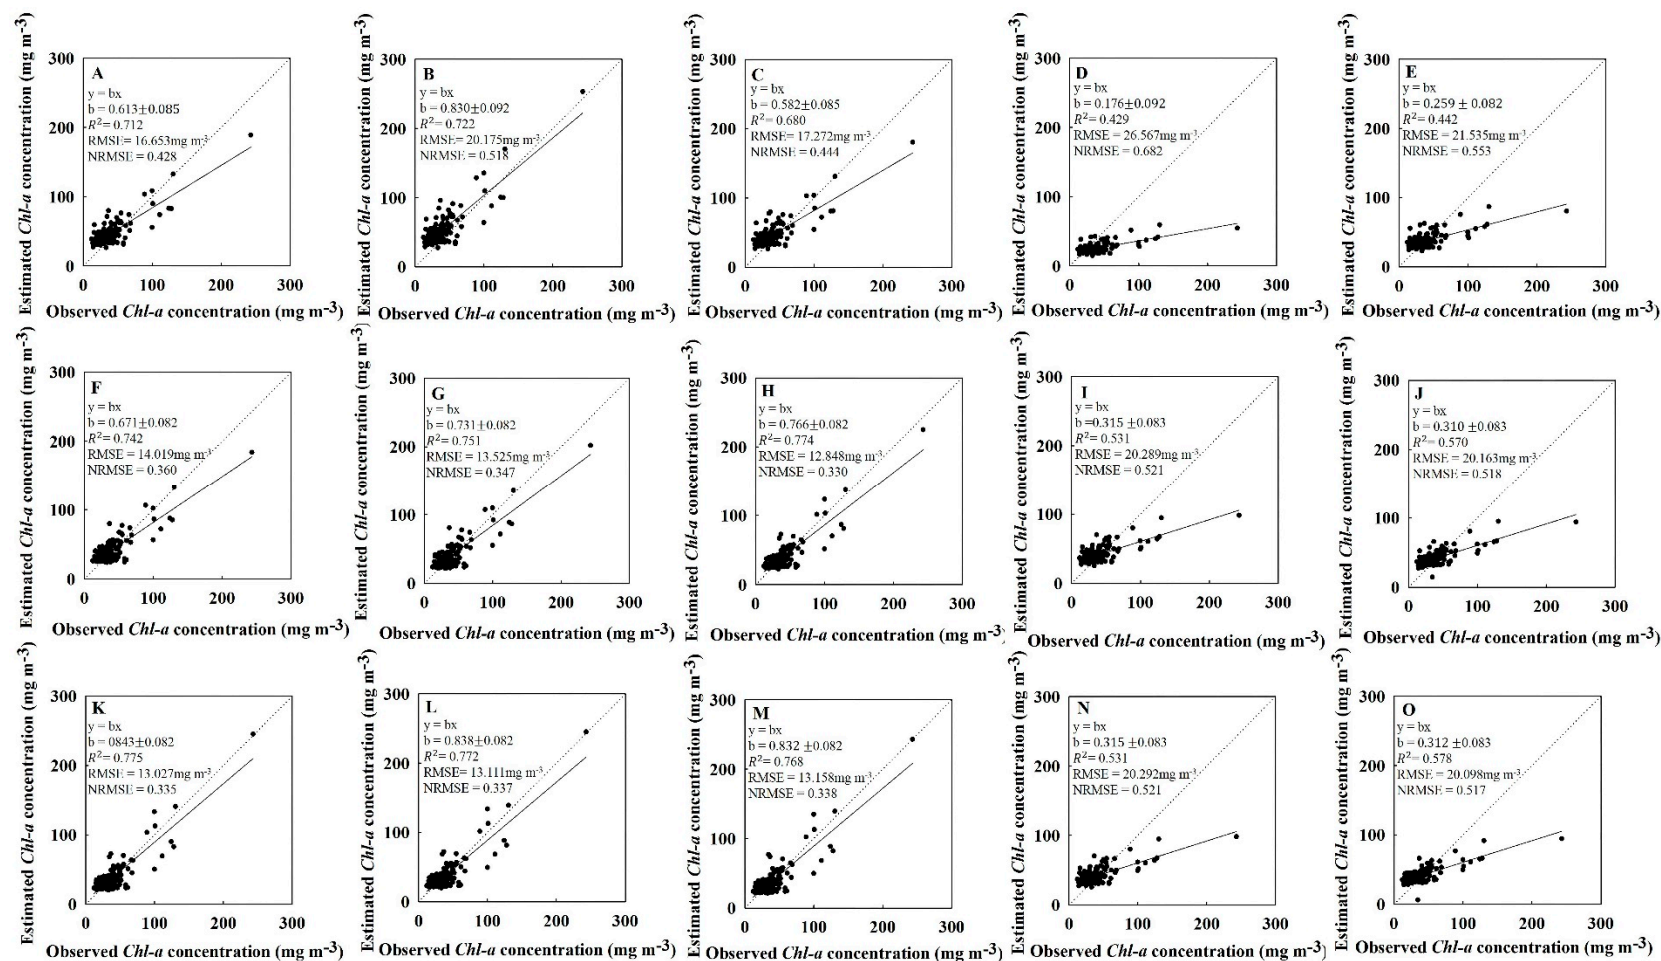

**Figure S7.** Comparison of measured, published and estimated from the single-objective and multi-objective optimization *Chl-a* concentration in *Chl-a* algorithms. The top five panels are developed with published values, the middle five panels are developed with the single-objective optimization, and the bottom five panels are developed with the multi-objective optimization. A, F and K are Gons algorithm results, B, G, and L are Gons algorithm results, C, H, and M are Ritchie algorithm results, D, I, and N are Simis algorithm results, and E, J, and O are Duan algorithm results



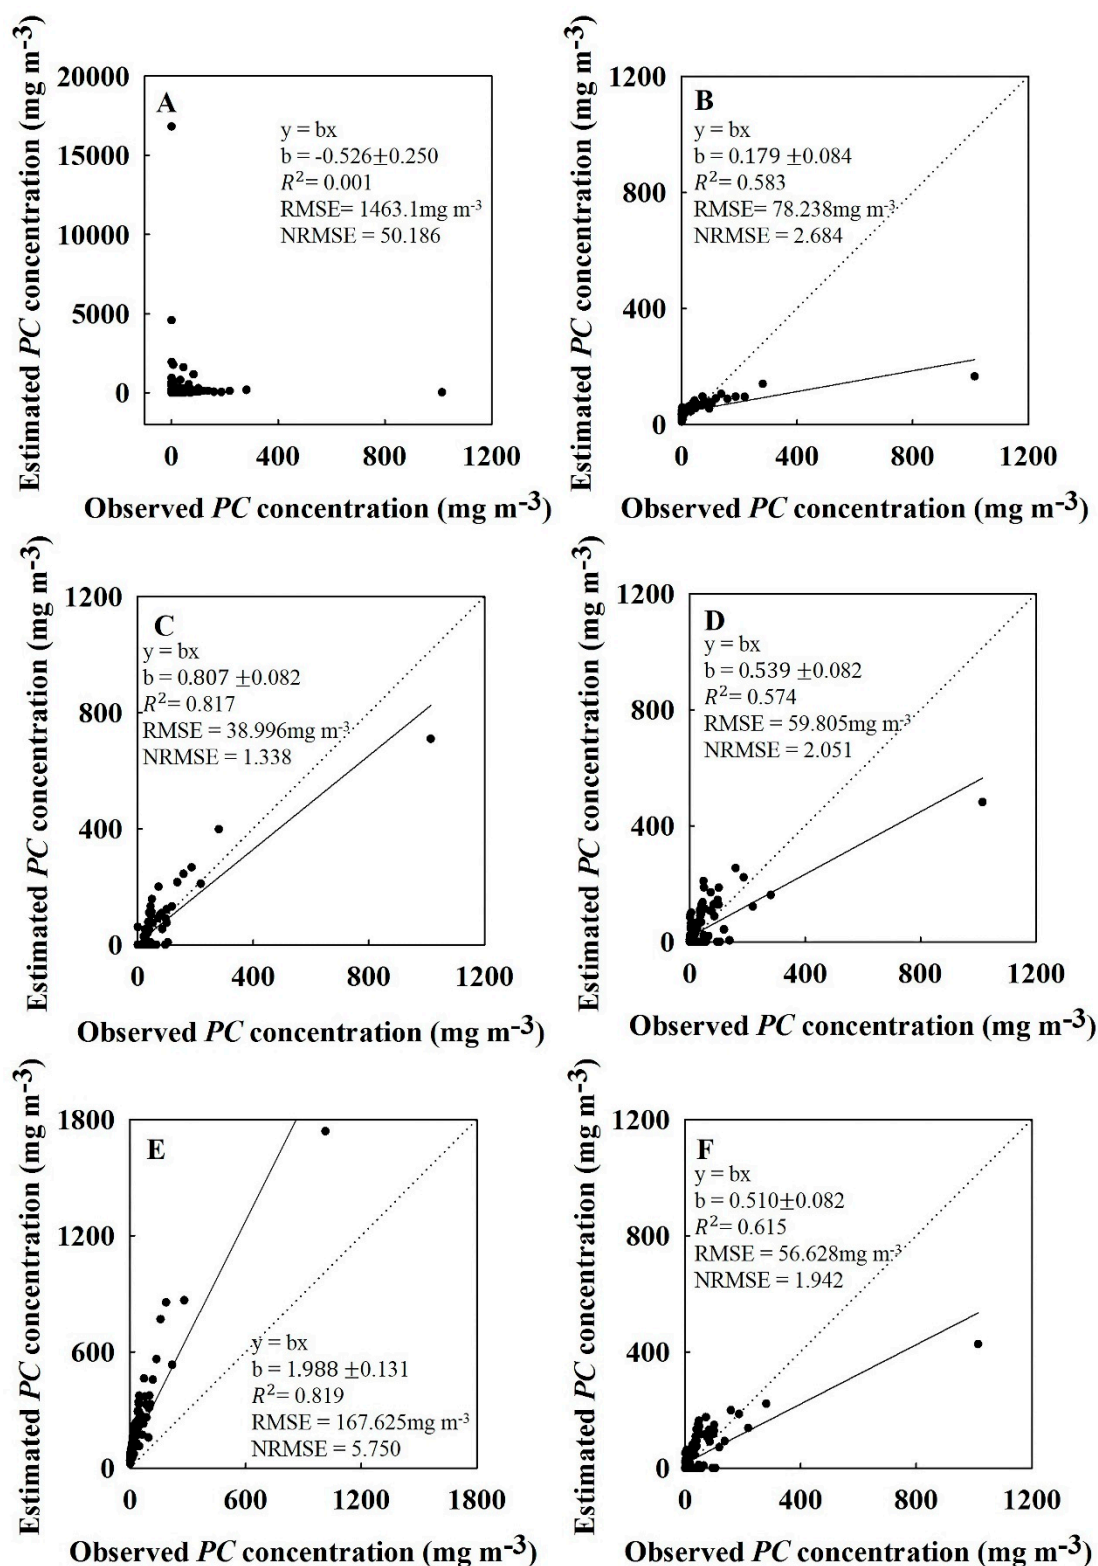

**Figure S8.** Comparison of measured, published and estimated from the single-objective and multi-objective optimization PC concentration in PC algorithms. The top two panels are developed with published values, the middle two panels are developed with single-objective optimization the bottom two panels are developed with the multi-objective optimization. A, C, and E are Li algorithm results, and B, D, and F are Simis algorithm results
